# Supplementary material for: TRPV4 activation by TGFβ2 enhances cellular contractility and drives ocular hypertension
Source: eLife. 2025 Jun 24;14:RP104894. doi: 10.7554/eLife.104894 (PMC12187138; doi:10.7554/eLife.104894)
Supplement: Figure 5—source data 1. [file elife-104894-fig5-data1.xlsx]

## Sheet: Figure 5A-B Data Points
LV-Control and LV-TGFB2 indicates treatment (number indicates animal; each animal had LV-Control and LV-TGFB2 in contralateral eyes)
		LV-Control					LV-TGFB2
	Animal	1A	2A	3A	4A	5A	1B	2B	3B	4B	5C	LV-Ctrl Average	LV-Ctrl S.D.	LV-TGFB2 Average	LV-TGFB2 S.D.
	0.2	12.1818	10.6364	13.5	12.5455	12.6364	11.8889	12.8182	13.1	13.7	13	12.3	1.04822	12.9014	0.655559
	0.8	14.1818	12.9	12.5	13.9091	12.8	12.7273	12.2308	12.8182	11.8	15	13.2582	0.739908	12.9152	1.23524
	2	12.75	12.5833	12.1667	12.9167	13.75	19.2727	14.5	15.875	15.4706	19.25	12.8333	0.583333	16.8737	2.23622
	3	14.6	14.0909		12.3333	14.9091	23.7273	13.9		18.5454	23.5454	13.9833	1.15056	19.9295	4.68219
	3.5	13.8	11.9	13.9091	10.2727	12.9091	20.2	16.3636	20.5	13.5	19	12.5582	1.51218	17.9127	2.95718
	4	11.3333	14.0909	15.3	10.7	14.7	14.3	21	21.8	16.4546	19.2727	13.2248	2.07275	18.5655	3.14402
	4.5	12.4	13.4	14.6	15.4	13.9167	19.8571	15.5	19.0769	14.2	24.3636	13.9433	1.14356	18.5995	3.99992
	5	12.4545	12	11.8	13.8182	15.0769	17.7273	17.9091	17.1	23.1667	13.9	13.0299	1.38889	17.9606	3.33127
	5.64	11	12.9091	15.5333	13.0833	10.7	10.8461	10.0833	12.9	13.9	13.3	12.6451	1.94251	12.2059	1.65099
	5.78	12.5	14.8182	13.1818	12.3	14	14.1	16.1	13.2	14.3	14	13.36	1.05248	14.34	1.06911
	5.92	12.5455	10.4545	14.2	14.8	13.9	16.2	11.3	14.1	13.5455	15.1	13.18	1.73306	14.0491	1.84015
	6.06	11.6364	11.5833	13.2143	11.1	12.9091	15.0625	14.7273	14.3846	16.1818	13.7333	12.0886	0.918903	14.8179	0.907241
	6.5	12.9091	12.4545	14.4	14.25	15.6667	17.5556	17.3571	17.1667	15.1333	22.0909	13.9361	1.28046	17.8607	2.55742
	7	13.8	11.9	14.3158	12.6667	12.0909	16.9	16.1818	17.2273	19.5	21.4546	12.9547	1.06167	18.2527	2.17816
	7.5	11.1	13.0909	12	12.3636	13.4	15.9091	16.2	17.5833	16.0909	19.2	12.3909	0.912177	16.9967	1.39971
	8	13.2	11.7	13.3	13.7273	13.2	21	18.1818	16.3	19.5	18.6	13.0255	0.772283	18.7164	1.72968
	8.64	9.73333	11.5833	12.5	12.1053	13.1111	13.3	15.6364	15.1429	13.6875	13.1765	11.8066	1.28647	14.1886	1.12603
	8.78	12.4	13.3	11.3	12.7	12	17.5833	17.9167	15.9167	11.8182	16.6	12.34	0.750333	15.967	2.451
	8.92	12.5	14	12.1	12.7857	14.1333	19.4546	18.5	17	16.1177	21.3636	13.1038	0.913301	18.4872	2.06376
	9.06	11	12.6	12.7143	13.3846	12.9231	18.6364	17.5333	16.9286	17.4118	21	12.5244	0.903395	18.302	1.63254
	9.76	11.0909	11.6	12	12.7857	14.3636	18	16.0909	18.8333	15.75	19.0833	12.3681	1.27606	17.5515	1.54673
	Figure 5B compares the IOP from the WT cohort in 5a, grouping the data from the HC-06 and PBS injections and comparing before, and after either compound was injected
		LV-Control					LV-TGFB2
	Animal	1A	2A	3A	4A	5A	1B	2B	3B	4B	5C
HC-06	Pre-Injection	12.4545	12	11.8	13.8182	15.0769	17.7273	17.9091	17.1	23.1667	13.9				LV-Ctrl Average	LV-Ctrl S.D.	LV-TGFB2 Average	LV-TGFB2 S.D.
	1d	11	12.9091	15.5333	13.0833	10.7	10.8461	10.0833	12.9	13.9	13.3		HC-06	Pre-Injection	13.0299	1.38889	17.9606	3.33127
	2d	12.5	14.8182	13.1818	12.3	14	14.1	16.1	13.2	14.3	14			1d	12.6451	1.94251	12.2059	1.65099
	3d	12.5455	10.4545	14.2	14.8	13.9	16.2	11.3	14.1	13.5455	15.1			2d	13.36	1.05248	14.34	1.06911
	4d	11.6364	11.5833	13.2143	11.1	12.9091	15.0625	14.7273	14.3846	16.1818	13.7333			3d	13.18	1.73306	14.0491	1.84015
														4d	12.0886	0.918903	14.8179	0.907241
													PBS	Pre-Injection	13.0255	0.772283	18.7164	1.72968
														1d	11.8066	1.28647	14.1886	1.12603
PBS	Pre-Injection	13.2	11.7	13.3	13.7273	13.2	21	18.1818	16.3	19.5	18.6			2d	12.34	0.750333	15.967	2.451
	1d	9.73333	11.5833	12.5	12.1053	13.1111	13.3	15.6364	15.1429	13.6875	13.1765			3d	13.1038	0.913301	18.4872	2.06376
	2d	12.4	13.3	11.3	12.7	12	17.5833	17.9167	15.9167	11.8182	16.6			4d	12.5244	0.903395	18.302	1.63254
	3d	12.5	14	12.1	12.7857	14.1333	19.4546	18.5	17	16.1177	21.3636
	4d	11	12.6	12.7143	13.3846	12.9231	18.6364	17.5333	16.9286	17.4118	21
