# Supplementary material for: TRPV4 activation by TGFβ2 enhances cellular contractility and drives ocular hypertension
Source: eLife. 2025 Jun 24;14:RP104894. doi: 10.7554/eLife.104894 (PMC12187138; doi:10.7554/eLife.104894)
Supplement: Figure 5—source data 2. [file elife-104894-fig5-data2.xlsx]

## Sheet: Figure 5C-D Data Points
TRPV4-/-				TRPV4-/- LV-Ctrl						TRPV4-/- LV-TGFB2
LV-Ctrl Avg	LV-TGF Avg		Animal (within genotype)	1	2	3	4	5	6	1	2	3	4	5	6
12.7242	12.9045	Time (Weeks)	Baseline 1 (0.2)	12.5	11.5455	12.1	12.9	14.8	12.5	12.1818	12.9091	12.6364	12.9	14.1	12.7
13.0119	13.1881		Baseline 2 (0.8)	11.8	13.3	11.1	13.4545	14.4167	14	12.5	14	11.6364	13.4545	14.0833	13.4545
12.9108	15.7498		2	11.0833	12.7273	13.6	13.5	12.0833	14.4706	15.1667	16.8182	15.3333	14.5385	16.4546	16.1875
12.2669	15.8703		2.5 (Not Included)	11.3636	12	11.625	12.0667	12.7	13.8462	16.3333	15.1667	16.0909	14.0909	15.7273	17.8125	Week 2.5 Not included due to lack of WT data at matched time (N=2 animals)
13.1621	15.4838		3	12.7	14.1818	11.0909	14.6	13.8	12.6	16.7	17.9	15.4545	14.1667	15.1818	13.5
12.1621	14.9991		4	11.4545	14.2727	12.9	10.2	12.6	11.5455	14.6364	15.9167	16.5454	12.1429	15.1818	15.5714
12.4045	14.6992		4.5	12.2727	11.4545	12.5833	13.6	12.4167	12.1	14.1818	13.7	14.6923	14.25	15.9167	15.4545
12.8667	15.2663		5	10.8	13.25	13.5	11.7	14.2	13.75	14.2	16.0714	15.2778	14.7	15.6154	15.7333
WT				WT LV-Ctrl															WT LV-TGFB2
LV-Ctrl Avg	LV-TGF Avg		Animal (within genotype)	1	2	3	4	5	6	7	8	9	10	11	12	13	14	15	1	2	3	4	5	6	7	8	9	10	11	12	13	14	15
12.6279	12.4007	Time (Weeks)	Baseline 1 (0.2)	12.2727	10.3	14.3	14	12.2	13.3	11.6	13.4	14.0909	12.4545	12.1818	10.6364	13.5	12.5455	12.6364	12.7273	12	12.4545	15.2222	12	11.1	12.9	10.7	11.6	10.8	11.8889	12.8182	13.1	13.7	13
13.5858	13.1041		Baseline 2 (0.8)	14.3636	12.9231	13.2727	14.4545	14.3	14.5	13.5	14	12.8182	13.3636	14.1818	12.9	12.5	13.9091	12.8	13.2727	12.3	12.4	13.0909	12.7	12.9091	13	14.1667	14.5455	13.6	12.7273	12.2308	12.8182	11.8	15
12.8837	17.1244		2	12.5455	13.1429	13.6364	12.5455	11.9	11.8182	11.5455	13.7	13.8182	14.4375	12.75	12.5833	12.1667	12.9167	13.75	24	15.2857	14.8	16.5454	18	16.6667	18.2	13.9167	17.4167	17.6667	19.2727	14.5	15.875	15.4706	19.25
12.55	20.9441		2.5 (Not Included)	13.7	11.4														24.2727	17.6154
13.266	18.605		3	14.6923	12.9091	11.3333	13.0909	12.8182	12.5	12	12.4615	14.8182	13.1667	14.6	14.0909		12.3333	14.9091	22.4	17.125	16.7273	15.5	18.1	17.4167	19.3333	18.0588	20.3636	15.7273	23.7273	13.9		18.5454	23.5454
12.747	17.6895		4		13.2	14.1818	10.9091	11.7	10.4	11.2	12.9091	14.0833	13.75	11.3333	14.0909	15.3	10.7	14.7		16.875	18	16.5625	18.2727	14.8333	18.4	16.0714	15.7273	20.0833	14.3	21	21.8	16.4546	19.2727
13.6408	18.5286		4.5		14.2	12.6	11.1	13	14.3	15.4545	13.7	12.9	14	12.4	13.4	14.6	15.4	13.9167		19.6875	15.9	15.1818	18.9091	22.7273	20	18.2143	16.0833	19.7	19.8571	15.5	19.0769	14.2	24.3636
12.8303	18.6695		5		12.8333			12.75	11.9091					12.4545	12	11.8	13.8182	15.0769		20			21.6364	17.9167					17.7273	17.9091	17.1	23.1667	13.9
														Animals of WT LV Cohort previously included in Fig. 5A															Animals of WT LV Cohort previously included in Fig. 5A
