# Supplementary material for: TRPV4 activation by TGFβ2 enhances cellular contractility and drives ocular hypertension
Source: eLife. 2025 Jun 24;14:RP104894. doi: 10.7554/eLife.104894 (PMC12187138; doi:10.7554/eLife.104894)
Supplement: Figure 6—source data 1. [file elife-104894-fig6-data1.xlsx]

## Sheet: Figure 6 Data Points
Figure 6A	Cohort 1					Figure 6B	Cohort 2
Eye	LV-Ctrl Day (awake)	LV-Ctrl Night (Isoflurane)	LV-TGFβ2 Day (awake)	LV-TGFβ2 Night (Isoflurane)		Eye	LV-Ctrl Day (Awake)	LV-Ctrl Night (Awake)	LV-TGFβ2 Day (Awake)	LV-TGFβ2 Night (Awake)
1	12.5	20.2	17.9091	20.9167		1	12.2	19.2	19.5	21
2	12.1	20.7	19.7	20.3		2	12.1818	18.2	19.7	20.6
3	12.4	20.5	20.3333	20.1818		3	12.7	20.7	19.9	19.1
4	13	20	19.2727	21		4	13.5	20.2	19.9091	19.9
mean	12.5	20.35	19.3	20.6		5	12.1	20.0909
sd	0.3742	0.3109	1.027	0.4184		6	13	20.4
						mean	12.6136	19.7985	19.7523	20.15
						sd	0.559242	0.931087	0.193898	0.834666
Figure 6E-F	Day LV-Ctrl PBS				Mean	S.D.
Pre-Injection	12.1	12.4	12.4167	12.6	12.3792	0.206996
48 hr post	11.5	12.4545	12.9	13	12.4636	0.684781
72 hr post	12.2	11.8	12.4167	13.2	12.4042	0.588843
96 hr post	12.9	12.6	12.7	12.3333	12.6333	0.235704
	Day LV-Ctrl HC-06				Mean	S.D.
Pre-Injection	12.5	13	12.3	14.4	13.05	0.946925
48 hr post	12.6	12.6364	12.2727	13.75	12.8148	0.644572
72 hr post	12.2	12.3	12.6364	14.1	12.8091	0.880615
96 hr post	12.6	12.4	12.2	14.5	12.925	1.06262
	Day LV-TGFB2 PBS				Mean	S.D.
Pre-Injection	19.7	20.3333	18.6923	19	19.4314	0.734389
48 hr post	19.1667	19.5833	17.9091	19.1333	18.9481	0.722298
72 hr post	19.6	20.1	20.5455	18.1818	19.6068	1.0255
96 hr post	19.2	19.3	20.1	17.5	19.025	1.09354
	Day LV-TGFB2 HC-06				Mean	S.D.
Pre-Injection	17.9091	19.2727	20.4	19.25	19.208	1.01882
48 hr post	12.2727	12	14.6667	16.2667	13.8015	2.03373
72 hr post	13.5	14.0833	15.2308	14.7	14.3785	0.750248
96 hr post	17.8333	19.1818	19.6364	19.5	19.0379	0.825307
Figure 6C	Night LV-Ctrl PBS				Mean	S.D.
Pre-Injection	20.7	20.5	21.5	19.4545	20.5386	0.84202
48 hr post	20.6	20.6	21.1	20.3	20.65	0.331662
72 hr post	19.3	19.7	20.8	21	20.2	0.828654
96 hr post	20.5385	20.9	20.7	20.0909	20.5573	0.344326
	Night LV-Ctrl HC-06				Mean	S.D.
Pre-Injection	20.2	20	21.6364	21	20.7091	0.754197
48 hr post	15.95	15.4545	14.2857	15.2	15.2226	0.697898
72 hr post	15.3636	15.0909	15.7	15.3846	15.3848	0.249112
96 hr post	20	20.7	20.0909	20.7	20.3727	0.37972
	Night LV-TGFB2 PBS				Mean	S.D.
Pre-Injection	20.3	20.1818	19.9	20.6	20.2455	0.289865
48 hr post	20.5	20.8	20.4	20.8	20.625	0.206155
72 hr post	20.4	20.1667	19.8	20.3	20.1667	0.262467
96 hr post	20.7	21.8	37.5833	20.8	25.2208	8.25662
	NIght LV-TGFB2 HC-06				Mean	S.D.
Pre-Injection	20.9167	21	20	20.1429	20.5149	0.516487
48 hr post	16.9333	14.6471	13.7	16.1	15.3451	1.44752
72 hr post	15.2727	13.75	15.2	16.5	15.1807	1.12491
96 hr post	20.25	20.7	19.8571	19.6	20.1018	0.480093
